# Supplementary material for: Prevention of neural tube defects in the UK: a missed opportunity
Source: PubMed Central journal article supplement — Arch Dis Child. 2015 Dec 17;101(7):604–7. doi: 10.1136/archdischild-2015-309226 (PMC4941168; doi:10.1136/archdischild-2015-309226), 2015-12-17
Supplement: archdischild-2015-309226-s1.pdf [file archdischild-2015-309226-s1.pdf]

Appendix Table 1 : Pregnancies (live births, late fetal losses after 20 weeks gestation and terminations) with an NTD in England, Wales, Scotland and Ireland 1991-2012

| Year of birth | Prevalence of all pregnancies with an NTD (adj for register) | Prevalence of live births with an NTD (adj for register) | Number of population live births (1,000s) | Number of pregnancies with an NTD | Proportion of pregnancies with an NTD resulting in a termination (%) | Number of terminations with an NTD | Number of live births with an NTD |
|---------------|--------------------------------------------------------------|----------------------------------------------------------|-------------------------------------------|-----------------------------------|----------------------------------------------------------------------|------------------------------------|-----------------------------------|
|               | A                                                            | B                                                        |                                           |                                   | C                                                                    |                                    |                                   |
| 1991          | 1.61                                                         | 0.28                                                     | 792                                       | 1274                              | 81                                                                   | 1029                               | 221                               |
| 1992          | 1.54                                                         | 0.26                                                     | 781                                       | 1206                              | 81                                                                   | 981                                | 200                               |
| 1993          | 1.67                                                         | 0.17                                                     | 762                                       | 1274                              | 85                                                                   | 1083                               | 126                               |
| 1994          | 1.24                                                         | 0.13                                                     | 750                                       | 928                               | 86                                                                   | 798                                | 95                                |
| 1995          | 1.39                                                         | 0.25                                                     | 732                                       | 1020                              | 77                                                                   | 789                                | 186                               |
| 1996          | 1.41                                                         | 0.14                                                     | 733                                       | 1030                              | 88                                                                   | 907                                | 105                               |
| 1997          | 1.50                                                         | 0.21                                                     | 727                                       | 1088                              | 80                                                                   | 866                                | 153                               |
| 1998          | 1.31                                                         | 0.13                                                     | 717                                       | 936                               | 85                                                                   | 797                                | 96                                |
| 1999          | 1.28                                                         | 0.17                                                     | 700                                       | 898                               | 81                                                                   | 732                                | 119                               |
| 2000          | 1.32                                                         | 0.17                                                     | 679                                       | 898                               | 84                                                                   | 751                                | 118                               |
| 2001          | 1.32                                                         | 0.16                                                     | 669                                       | 884                               | 83                                                                   | 738                                | 108                               |
| 2002          | 1.37                                                         | 0.22                                                     | 669                                       | 915                               | 78                                                                   | 714                                | 144                               |
| 2003          | 1.34                                                         | 0.17                                                     | 696                                       | 931                               | 82                                                                   | 760                                | 120                               |
| 2004          | 1.27                                                         | 0.18                                                     | 716                                       | 910                               | 81                                                                   | 739                                | 132                               |
| 2005          | 1.26                                                         | 0.16                                                     | 716                                       | 905                               | 85                                                                   | 766                                | 115                               |
| 2006          | 1.26                                                         | 0.17                                                     | 742                                       | 931                               | 83                                                                   | 774                                | 129                               |
| 2007          | 1.13                                                         | 0.16                                                     | 772                                       | 875                               | 83                                                                   | 722                                | 125                               |
| 2008          | 1.09                                                         | 0.21                                                     | 794                                       | 863                               | 78                                                                   | 676                                | 166                               |
| 2009          | 1.29                                                         | 0.21                                                     | 790                                       | 1019                              | 80                                                                   | 814                                | 166                               |
| 2010          | 1.27                                                         | 0.25                                                     | 807                                       | 1022                              | 77                                                                   | 787                                | 201                               |
| 2011          | 1.28                                                         | 0.18                                                     | 808                                       | 1034                              | 82                                                                   | 851                                | 142                               |
| 2012          | 1.24                                                         | 0.21                                                     | 813                                       | 1012                              | 76                                                                   | 772                                | 172                               |
